# Supplementary material for: Phosphodiesterase 5 Inhibitor Use and Risk of Conventional and Serrated Precursors of Colorectal Cancer
Source: Oxford University Press journal article supplement (doi:10.1158/1055-9965.epi-20-1126), 2020-12-22
Supplement: 10559965epi201126-sup-248359_2_supp_6637090_qhyqqn.docx [file 10559965epi201126-sup-248359_2_supp_6637090_qhyqqn.docx]

Supplemental Table 1. Baseline sildenafil use ever before, erectile dysfunction and risk of conventional adenoma and serrated lesion, HPFS 2000-2010

|  | Total person-endoscopies, n(%) | Total cases, n | Model 1a  OR (95% CI) | Model 2b  OR (95% CI) | Model 3c  OR (95% CI) |
| --- | --- | --- | --- | --- | --- |
| Serrated polyps |  |  |  |  |  |
| No ED | 27308(70) | 965 | 1(ref) | 1(ref) | 1(ref) |
| ED with PDE5 | 3376(8) | 145 | 1.29(1.07-1.55) | 1.22(1.02-1.48) | 1.22(1.01-1.47) |
| ED without PDE5 | 8539(22) | 285 | 1.04(0.90-1.21) | 1.01(0.87-1.17) | 1.00(0.86-1.16) |
| Conventional adenomas |  |  |  |  |  |
| No ED | 28138(70) | 1795 | 1(ref) | 1(ref) | 1(ref) |
| ED with PDE5 | 3483(8) | 252 | 1.13(0.98-1.31) | 1.10(0.95-1.27) | 1.10(0.95-1.27) |
| ED without PDE5 | 8802(22) | 548 | 0.95(0.85-1.07) | 0.93(0.83-1.04) | 0.93(0.83-1.04) |
| Any polyps |  |  |  |  |  |
| No ED | 28763(70) | 2420 | 1(ref) | 1(ref) | 1(ref) |
| ED with PDE5 | 3571(8) | 340 | 1.17(1.03-1.33) | 1.13(1.00-1.29) | 1.13(0.99-1.28) |
| ED without PDE5 | 8961(22) | 707 | 0.96(0.87-1.06) | 0.94(0.85-1.04) | 0.93(0.84-1.03) |
| Advanced conventional adenomas |  |  |  |  |  |
| No ED | 26929(70) | 586 | 1(ref) | 1(ref) | 1(ref) |
| ED with PDE5 | 3330(8) | 99 | 1.25(1.00-1.57) | 1.21(0.96-1.51) | 1.21(0.96-1.51) |
| ED without PDE5 | 8463(22) | 209 | 0.96(0.80-1.16) | 0.93(0.78-1.12) | 0.93(0.77-1.12) |

Abbreviations: HPFS, Health Professionals Follow-up Study; OR, odds ratio; ED, erectile dysfunction.

aAdjusted for age (continuous variable), race (white or nonwhite), family history (yes or no), height (continuous variable), BMI (<22.5, 22.5-24.9, 25.0-27.4, 27.5-29.9 and >=30.0 kg/m2) and time period of endoscopy (in 2-year intervals).

bAdditionally adjusted for physical activity (<7.5, 7.5-14.9, 15-29.9, 30-59.9, >=60 MET-hours/week), smoking (never smokers, past smokers with <30 pack-years, past smokers with >=30 pack-years, current smokers with <30 pack-years, current smokers with >=30 pack-years), alcohol intake (never, <7, 7-13.9, >=14 g/day) and regular aspirin use (yes or no)

cAdditionally adjusted for vitamin D intake (quartiles), calcium intake (quartiles), total folate intake (quartiles), processed red meat (quartiles).
